# Supplementary material
Source: Springer Nature journal article supplement (https://www.springermedizin.de/resource/supplementary/12884_2002_20_MOESM2_ESM.pdf/9459464)

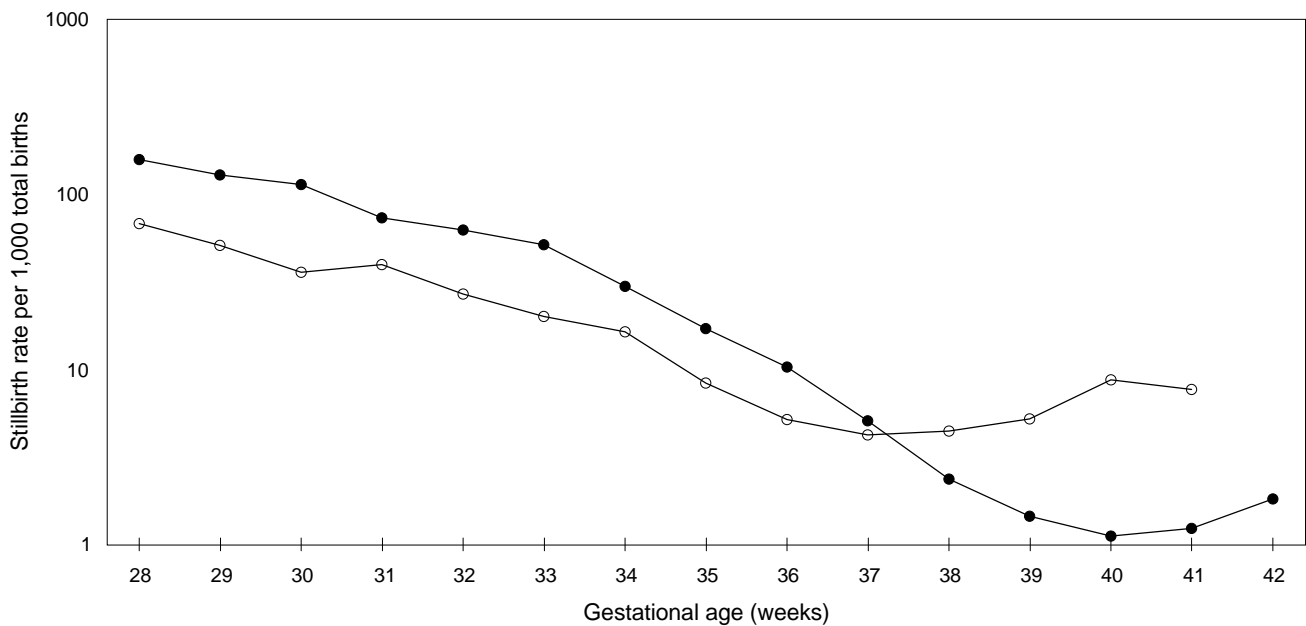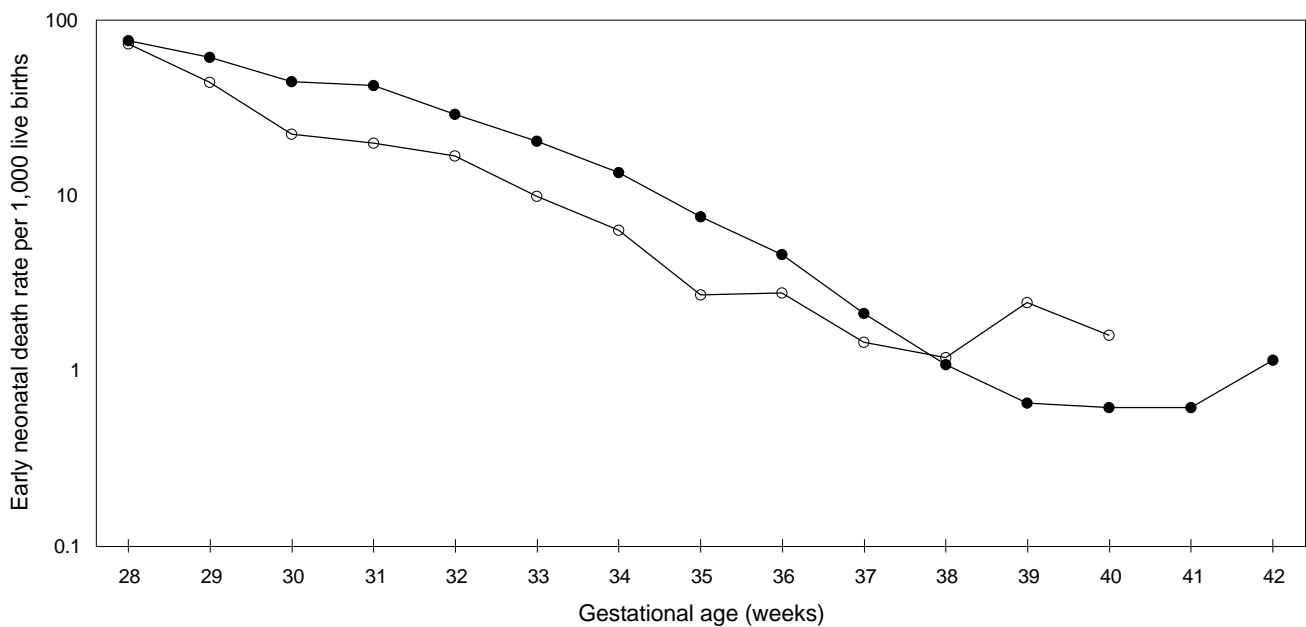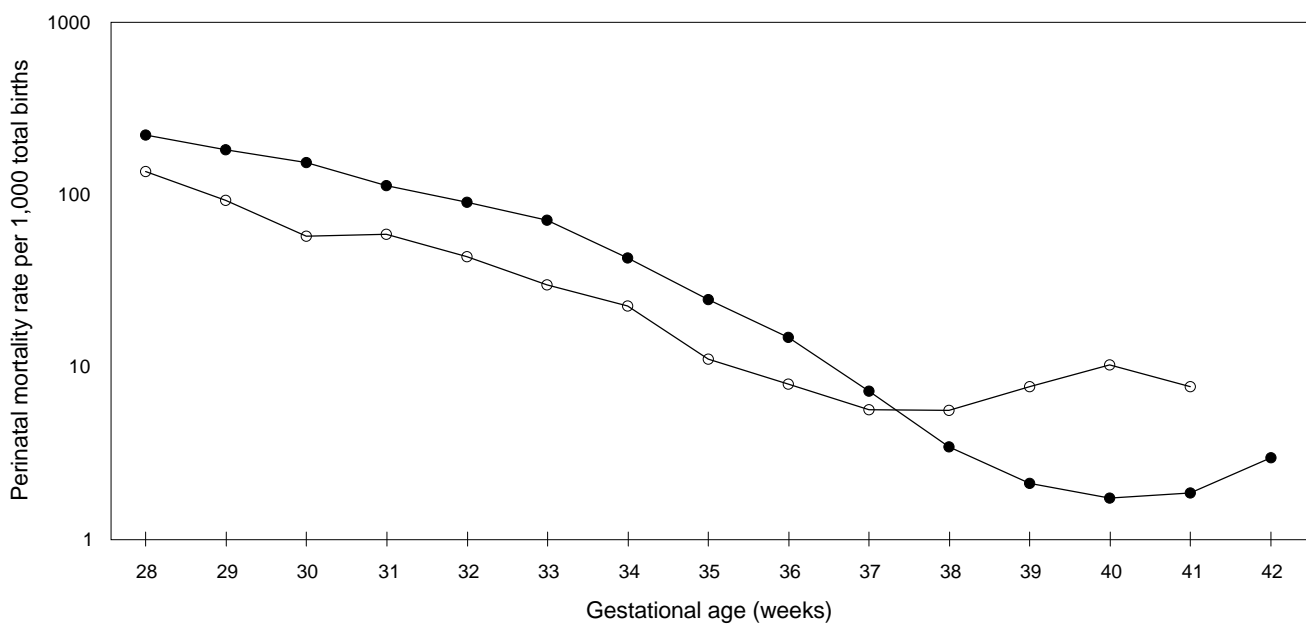

● Singletons ○ Twins

Supplement: MOESM2 [file 9459464]
